# Supplementary material for: Metabolomic Signatures of Autism Spectrum Disorder
Source: MDPI journal article supplement (doi:10.3390/jpm12101727), 2022-10-17
Supplement: s1 [file s1]

| Table S1. Participant Characteristics               |                      |                        |                     |
|-----------------------------------------------------|----------------------|------------------------|---------------------|
| Variable                                            | Typically Developing | ASD without Regression | ASD with Regression |
| Number of Subjects                                  | 37                   | 28                     | 29                  |
| Age, mean (SD), years months                        | 8 y 2 m (4 y 4 m)    | 8y 4m (3y 9m)          | 8y 0m (3y 6m)       |
| Females, N (%)                                      | 17 (46%)             | 14 (50%)               | 4 (14%)             |
| Regression, N (%)                                   |                      |                        |                     |
| Single Regression                                   |                      |                        | 19 (65%)            |
| Age at 1 <sup>st</sup> Regression                   |                      |                        | 22m (7m)            |
| Loss of Language Skills                             |                      |                        | 23 (79%)            |
| Loss of Social Skills                               |                      |                        | 24 (83%)            |
| Loss of Gross Motor Skills                          |                      |                        | 8 (28%)             |
| Loss of Fine Motor Skills                           |                      |                        | 7 (24%)             |
| Associated Fever                                    |                      |                        | 6 (21%)             |
| Associated Illness                                  |                      |                        | 10 (34%)            |
| Associated Seizure                                  |                      |                        | 3 (10%)             |
| Associated Other                                    |                      |                        | 10 (35%)            |
| Associated Any Trigger                              |                      |                        | 18 (62%)            |
| Neurodevelopmental and Behavior Score Mean (St Dev) |                      |                        |                     |
| Language Ability (Scaled Score)                     | 102 (12)             | 74 (26)                | 63 (24)             |
| Vineland Adaptive Behavior Scale (Scaled Score)     |                      |                        |                     |
| • Communication Subscale                            | 107 (14)             | 69 (18)                | 63 (20)             |
| • Daily Living Skills Subscale                      | 105 (10)             | 67 (15)                | 64 (15)             |
| • Social Subscale                                   | 112 (11)             | 68 (15)                | 62 (14)             |
| • Motor Subscale                                    | 108 (13)             | 78 (18)                | 75 (14)             |
| • Adaptive Behavioral Composite                     | 108 (11)             | 66 (14)                | 62 (15)             |
| Social Responsiveness Scale (T-Score)               |                      |                        |                     |
| • Awareness                                         | 51 (11)              | 73 (12)                | 75 (14)             |
| • Cognitive                                         | 49 (10)              | 82 (11)                | 78 (10)             |
| • Communication                                     | 47 (8)               | 80 (13)                | 81 (11)             |
| • Motivation                                        | 49 (10)              | 72 (13)                | 78 (13)             |
| • Mannerisms                                        | 47 (11)              | 80 (18)                | 80 (12)             |
| • Total                                             | 47 (10)              | 83 (12)                | 83 (11)             |
| Aberrant Behavior Checklist (Raw Score)             |                      |                        |                     |
| • Irritability                                      | 3 (4)                | 17 (10)                | 13 (9)              |
| • Lethargy / Social Withdrawal                      | 1 (2)                | 14 (9)                 | 13 (8)              |
| • Stereotyped Movements                             | 0 (1)                | 8 (6)                  | 6 (5)               |
| • Hyperactivity                                     | 4 (7)                | 24 (12)                | 20 (11)             |
| • Inappropriate Speech                              | 0 (1)                | 4 (3)                  | 3 (3)               |
| Comorbid Conditions (Parent Report), N (%)*         |                      |                        |                     |
| Neurologic                                          | 3/26 (12%)           | 19/27 (70%)            | 17/26 (65%)         |
| Allergic                                            | 7/26 (27%)           | 15/27 (56%)            | 13/26 (50%)         |
| Psychiatric                                         | 2/26 (8%)            | 20/27 (74%)            | 13/26 (50%)         |
| Gastrointestinal                                    | 6/26 (23%)           | 15/27 (56%)            | 11/26 (42%)         |
| Immune                                              | 1/26 (4%)            | 7/27 (26%)             | 7/26 (27%)          |
| Growth                                              | 3/26 (12%)           | 10/27 (37%)            | 8/26 (31%)          |
| Endocrine                                           | 0/26 (0%)            | 1/27 (4%)              | 3/26 (12%)          |
| Cardiovascular                                      | 0/26 (0%)            | 2/27 (7%)              | 2/26 (8%)           |
| Comorbid Conditions (Medical Records), N (%)*       |                      |                        |                     |
| Food Allergies/Intolerances                         | 5/36 (14%)           | 19/25 (76%)            | 19/26 (73%)         |
| Epilepsy                                            | 0/37 (0%)            | 6/28 (21%)             | 13/29 (45%)         |
| Chronic Constipation                                | 4/34 (12%)           | 13/23 (57%)            | 11/28 (39%)         |
| Fatigue/Exercise Intolerance                        | 2/37 (5%)            | 6/28 (21%)             | 11/29 (38%)         |
| Recurrent Infections (AAAAI Criteria)               | 4/36 (11%)           | 4/20 (20%)             | 8/28 (29%)          |
| Gross Motor Delay                                   | 1/37 (3%)            | 13/28 (46%)            | 16/29 (55%)         |
| Hypogammaglobinemia                                 | 0/6 (0%)             | 2/21 (10%)             | 1/25 (4%)           |
| Failure to Thrive                                   | 0/37 (0%)            | 2/28 (7%)              | 5/29 (17%)          |
| Genetic Syndrome                                    | 0/37 (0%)            | 2/28 (7%)              | 0/29 (0%)           |
| Treatments, N (%)                                   |                      |                        |                     |
| Gastrointestinal Medications                        | 6 (16%)              | 12 (43%)               | 13 (45%)            |
| Melatonin                                           | 0 (0%)               | 9 (32%)                | 7 (24%)             |
| Allergy/Asthma Medications                          | 3 (8%)               | 8 (29%)                | 18 (40%)            |
| Mineral Supplements                                 | 0 (0%)               | 6 (21%)                | 5 (17%)             |
| Antiepileptic Medications                           | 0 (0%)               | 3 (11%)                | 8 (28%)             |
| Antimicrobial Medications                           | 0 (0%)               | 3 (11%)                | 3 (11%)             |
| Other Psychotropic Medications                      | 0 (0%)               | 3 (11%)                | 4 (14%)             |

|                                         |        |         |         |
|-----------------------------------------|--------|---------|---------|
| Immunomodulatory Medications            | 1 (3%) | 2 (7%)  | 6 (21%) |
| Stimulant                               | 0 (0%) | 8 (29%) | 4 (14%) |
| Alpha-adrenergic agonists               | 0 (0%) | 3 (11%) | 6 (21%) |
| Selective Serotonin Reuptake Inhibitors | 0 (0%) | 3 (11%) | 2 (7%)  |
| Hormone Supplementation                 | 0 (0%) | 1 (4%)  | 1 (3%)  |
| Thyroid Supplementation                 | 0 (0%) | 1 (4%)  | 1 (3%)  |
| Beta Blocker                            | 0 (0%) | 2 (7%)  | 2 (7%)  |
| Dietary Formula                         | 0 (0%) | 1 (4%)  | 1 (3%)  |

\*Some families did not answer every survey question and some information could not be abstracted from medical chart so not every patient is represented in these percentages.
